# Supplementary material
Source: Springer Nature journal article supplement (https://www.springermedizin.de/resource/supplementary/13256_2011_2220_MOESM1_ESM.pdf/9649220)

03/05/08

11:06:44

CBF3.5

2 LH 7.5

C

PA:Min

G66 D42

A60 E1

GR4 F50

DIST +

106mm

DIST x

46mm

F I D

COLLECTION

VESSIE

160

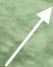

Supplement: MOESM1 [file 9649220]
